# Supplementary material for: Two-dimensional AlB4/Al2B2: high-performance Dirac anode materials for sodium-ion batteries
Source: Royal Society of Chemistry journal article supplement (doi:10.1039/d3cp03649a), 2023-01-01
Supplement: d3cp03649a1.pdf [file d3cp03649a1.pdf]

## Supplementary Information

### Two-Dimensional $AlB_4$ and $Al_2B_2$ : High-Performance Dirac Anodes for Sodium-Ion Batteries

Ru-Feng Zou,<sup>a</sup> Xiao-Juan Ye,<sup>b,\*</sup> Xiao-Hong Zheng,<sup>c</sup> Ran Jia,<sup>d</sup> Chun-Sheng Liu<sup>a,\*</sup>

<sup>a</sup>*College of Electronic and Optical Engineering, Nanjing University of Posts and Telecommunications, Nanjing 210023, China*

<sup>b</sup>*College of Integrated Circuit Science and Engineering, Nanjing University of Posts and Telecommunications, Nanjing 210023, China*

<sup>c</sup>*College of Information Science and Technology, Nanjing Forestry University, Nanjing 210037, China*

<sup>d</sup>*Institute of Theoretical Chemistry, College of Chemistry, Jilin University, Changchun 130023, China*

\*Email: yexj@njupt.edu.cn (X.-J.Y.).

\*Email: cslu@njupt.edu.cn (C.-S.L.).

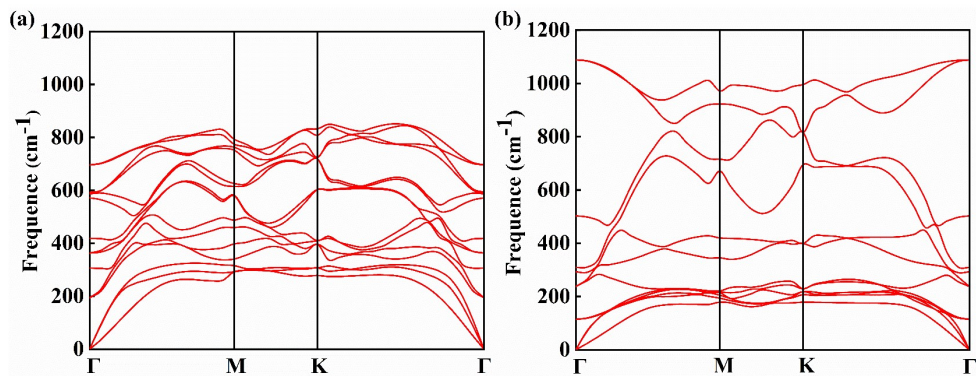

**Fig. S1** Phonon spectra of (a) monolayer  $\text{AlB}_4$  and (b)  $\text{Al}_2\text{B}_2$ .

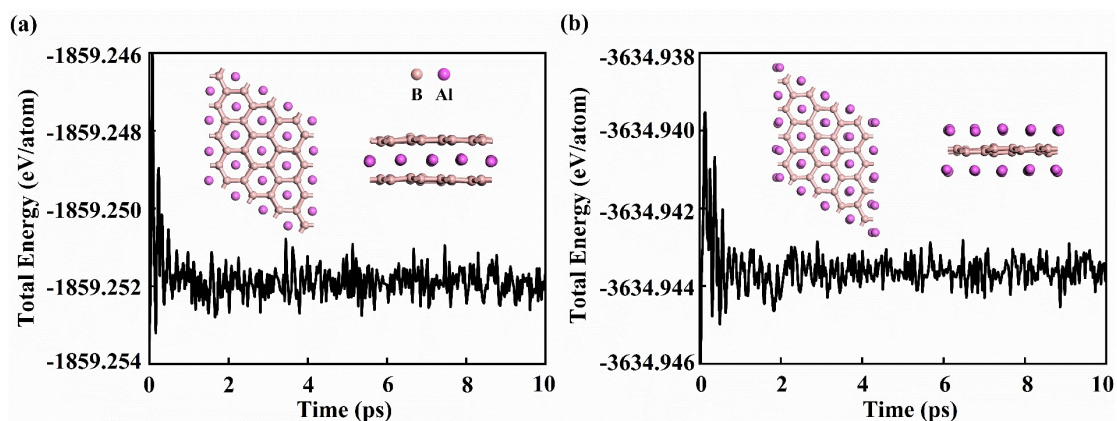

**Fig. S2** AIMD simulations at 400 K of (a) monolayer  $\text{AlB}_4$  and (b)  $\text{Al}_2\text{B}_2$ . The insets represent top and side views of the final snapshots.

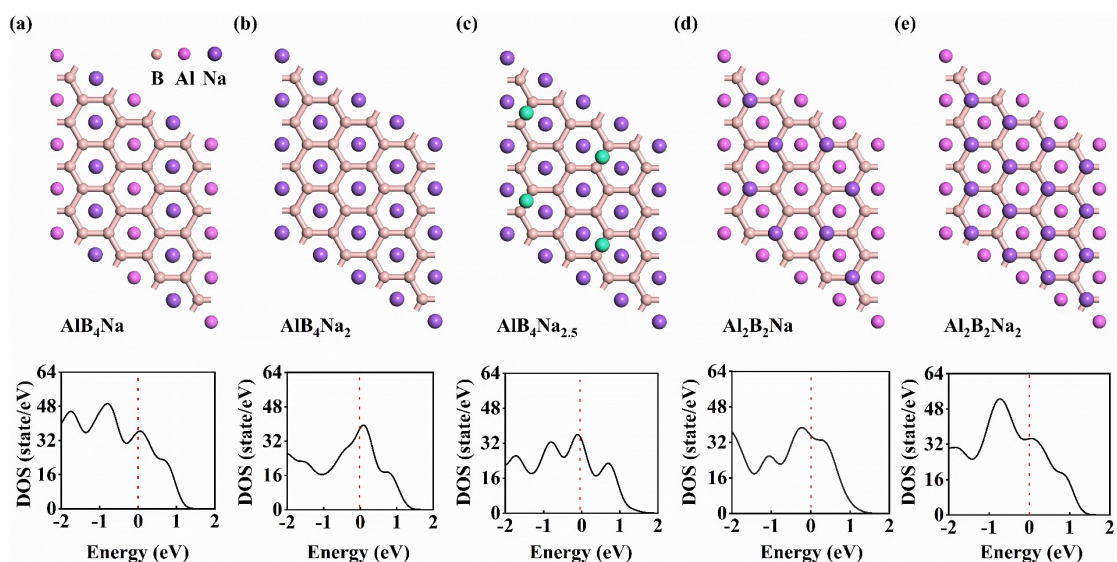

**Fig. S3** Top views and DOS of (a)  $\text{AlB}_4\text{Na}$ , (b)  $\text{AlB}_4\text{Na}_2$ , (c)  $\text{AlB}_4\text{Na}_{2.5}$ , (d)  $\text{Al}_2\text{B}_2\text{Na}$ , and (e)  $\text{Al}_2\text{B}_2\text{Na}_2$ . The green and cyan balls represent Na atoms adsorbed on the first layer and the second

layer, respectively.

**Table S1** The calculated differential adsorption energies of Na atoms adsorbed on AlB<sub>4</sub> and Al<sub>2</sub>B<sub>2</sub> monolayers.

| Number of Na atoms | $E_{\text{diff-ads}}$ (eV) of AlB <sub>4</sub> | $E_{\text{diff-ads}}$ (eV) of Al <sub>2</sub> B <sub>2</sub> |
|--------------------|------------------------------------------------|--------------------------------------------------------------|
| 1                  | 3.55                                           | 2.03                                                         |
| 2                  | 3.38                                           | 1.95                                                         |
| 3                  | 3.15                                           | 1.87                                                         |
| 4                  | 3.12                                           | 1.75                                                         |
| 5                  | 2.91                                           | 1.62                                                         |
| 6                  | 2.82                                           | 1.51                                                         |
| 7                  | 2.57                                           | 1.48                                                         |
| 8                  | 2.55                                           | 1.42                                                         |
| 9                  | 3.15                                           | 1.81                                                         |
| 10                 | 3.01                                           | 1.77                                                         |
| 11                 | 2.81                                           | 1.63                                                         |
| 12                 | 2.70                                           | 1.55                                                         |
| 13                 | 2.54                                           | 1.43                                                         |
| 14                 | 2.44                                           | 1.30                                                         |
| 15                 | 2.20                                           | 1.28                                                         |
| 16                 | 2.13                                           | 1.20                                                         |
| 17                 | 2.60                                           | 1.77                                                         |
| 18                 | 2.46                                           | 1.59                                                         |
| 19                 | 2.33                                           | 1.49                                                         |
| 20                 | 2.26                                           | 1.40                                                         |
| 21                 | 2.19                                           | 1.33                                                         |
| 22                 | 2.10                                           | 1.27                                                         |
| 23                 | 2.00                                           | 1.22                                                         |
| 24                 | 1.91                                           | 1.19                                                         |
| 25                 | 2.37                                           | 1.58                                                         |

|    |      |      |
|----|------|------|
| 26 | 2.25 | 1.53 |
| 27 | 2.13 | 1.46 |
| 28 | 2.11 | 1.37 |
| 29 | 1.98 | 1.32 |
| 30 | 1.83 | 1.27 |
| 31 | 1.67 | 1.25 |
| 32 | 1.57 | 1.18 |
| 33 | 1.81 | 1.09 |
| 34 | 1.75 | —    |
| 35 | 1.56 | —    |
| 36 | 1.43 | —    |
| 37 | 1.37 | —    |
| 38 | 1.31 | —    |
| 39 | 1.22 | —    |
| 40 | 1.17 | —    |
| 41 | 1.05 | —    |

---
